# Supplementary material for: Maize Gene Atlas Developed by RNA Sequencing and Comparative Evaluation of Transcriptomes Based on RNA Sequencing and Microarrays
Source: PLoS One. 2013 Apr 23;8(4):e61005. doi: 10.1371/journal.pone.0061005 (PMC3634062; doi:10.1371/journal.pone.0061005)
Supplement: Table S3 — Top 10 expressed genes in each tissue. (XLSX) [file pone.0061005.s010.xlsx]

## Sheet: Sheet2
Table S3. Top 10 expressed genes in each tissue
Leaf tissues
V3_Stem and SAM	FPKM	Functional annotation	V5_Tip of stage-2 Leaf	FPKM	Functional annotation	V9_Immature Leaves	FPKM	Functional annotation	V9_Thirteenth Leaf	FPKM	Functional annotation	V9_Eleventh Leaf	FPKM	Functional annotation	V9_Eighth Leaf	FPKM	Functional annotation	VT_Thirteenth Leaf	FPKM	Functional annotation	R2_Thirteenth Leaf	FPKM	Functional annotation
GRMZM2G326111_T01	12138	Peptidyl-prolyl cis-trans isomerase	GRMZM2G083841_T01	100888	PEP carboxylase	GRMZM2G042181_T01	32425.9	Protein binding protein	AC207722.2_FGT009	38850.4	Chlorophyll a-b binding protein 1, chloroplastic	AC207722.2_FGT009	51391.6	Chlorophyll a-b binding protein 1, chloroplastic	AC207722.2_FGT009	64459.2	Chlorophyll a-b binding protein 1, chloroplastic	GRMZM2G022958_T01	58242.6	glycine-rich protein	GRMZM2G022958_T01	61881.9	glycine-rich protein
GRMZM2G152908_T01	9893.44	Sucrose synthase 2	GRMZM2G122337_T01	74782.7	Chloroplast ferredoxin 1	GRMZM2G009465_T01	29897.6	Proline-rich protein	AC196475.3_FGT004	27647.7	Flavonoid O-methyltransferase	GRMZM2G402936_T01	34688.3	Chlorophyll a-b binding protein 2	GRMZM2G022958_T01	59633.9	glycine-rich protein	GRMZM2G168552_T01	50492.4	Bundle sheath cell specific protein 1	GRMZM2G168552_T01	45376.7	Bundle sheath cell specific protein 1
GRMZM2G050730_T01	6367.29	Pop3 peptide	AC207722.2_FGT009	61467.1	Chlorophyll a-b binding protein 1, chloroplastic	GRMZM2G152908_T01	15826	Sucrose synthase 2	GRMZM2G084958_T01	25436.6	Protochlorophyllide reductase A	GRMZM2G414192_T01	26991.1	Chlorophyll a-b binding protein	GRMZM2G168552_T01	55160.4	Bundle sheath cell specific protein 1	GRMZM2G083841_T01	41531.4	PEP carboxylase	GRMZM2G003762_T03	41778.9	Wali7 protein
GRMZM2G070912_T01	6212.51	Metallothionein type 2	GRMZM2G077333_T01	60374.5	Photosystem II 22 kDa protein	GRMZM2G064096_T01	15022.4	Germin	GRMZM2G402936_T01	21273.9	Chlorophyll a-b binding protein 2	AC196475.3_FGT004	25503.7	Flavonoid O-methyltransferase	GRMZM2G083841_T01	53849.4	PEP carboxylase	GRMZM2G003762_T03	33589.6	Wali7 protein	GRMZM2G306345_T05	33062.2	Pyruvate orthophosphate dikinase 1
GRMZM2G088511_T01	6200.01	Hypothetical gene of unknown function	GRMZM2G306345_T05	60045.7	Pyruvate orthophosphate dikinase 1	GRMZM2G152466_T01	10889.9	Tubulin alpha-3 chain	GRMZM2G414192_T01	13306.1	Chlorophyll a-b binding protein	GRMZM2G012397_T01	16754.3	Photosystem I reaction center subunit psaK	GRMZM2G402936_T01	46754.8	Chlorophyll a-b binding protein 2	GRMZM2G306345_T05	31285.4	Pyruvate orthophosphate dikinase 1	GRMZM2G083841_T01	26806.9	PEP carboxylase
GRMZM2G015295_T01	5718.01	Adenosylhomocysteinase	GRMZM5G845611_T01	51974.9	Glyceraldehyde-3-phosphate dehydrogenase B	GRMZM2G102356_T01	9612.7	Major latex protein 22	GRMZM2G101958_T01	12572.2	Non-specific lipid-transfer protein	GRMZM2G083841_T01	14069.3	PEP carboxylase	GRMZM2G306345_T05	43214.4	Pyruvate orthophosphate dikinase 1	GRMZM2G174984_T01	22531.6	Photosystem II 10 kDa polypeptide	GRMZM2G012397_T01	23066.1	Photosystem I reaction center subunit psaK
AC233865.1_FGT001	5525.88	Histone H4	GRMZM2G113033_T01	49562.8	Ribulose bisphosphate carboxylase small chain	GRMZM2G162276_T01	8899.25	Cortical cell-delineating protein	GRMZM2G049915_T01	10665.2	Cell wall protein	GRMZM2G155216_T02	13754.9	Chlorophyll a-b binding protein 1	GRMZM2G414192_T01	39845.3	Chlorophyll a-b binding protein	AC190623.3_FGT001	22330.1	Photosystem II reaction center W protein	GRMZM2G414192_T01	21590.1	Chlorophyll a-b binding protein
GRMZM2G003306_T01	5121.12	Histone H2A	GRMZM2G046284_T01	48902.2	Fructose-bisphosphate aldolase	AC207722.2_FGT009	8868.96	Chlorophyll a-b binding protein 1, chloroplastic	GRMZM2G155216_T02	9943.15	Chlorophyll a-b binding protein 1	GRMZM2G010884_T01	12065	Chlorophyll a-b binding protein 8	GRMZM2G012397_T01	39750.6	Photosystem I reaction center subunit psaK	GRMZM2G402936_T01	21480.2	Chlorophyll a-b binding protein 2	GRMZM2G174984_T01	20289.8	Photosystem II 10 kDa polypeptide
GRMZM2G152466_T01	5030.81	Tubulin alpha-3 chain	GRMZM2G414192_T01	41612.2	Chlorophyll a-b binding protein	AC209208.3_FGT002	8789.62	Aquaporin PIP1.1	GRMZM2G015295_T01	9123.77	Adenosylhomocysteinase	GRMZM2G084958_T01	11289.4	Protochlorophyllide reductase A	GRMZM2G010884_T01	36486.8	Chlorophyll a-b binding protein 8	GRMZM2G012397_T01	20581.5	Photosystem I reaction center subunit psaK	GRMZM2G402936_T01	19959.7	Chlorophyll a-b binding protein 2
GRMZM2G116273_T01	4881.49	Glutathione S-transferase GSTF2	GRMZM2G081114_T01	37184.7	Thylakoid soluble phosphoprotein TSP9 domain containing protein	AC196475.3_FGT004	8401.93	Flavonoid O-methyltransferase	GRMZM5G854138_T02	8693.73	Abscisic stress ripening protein 2	AC190623.3_FGT001	11258.7	Photosystem II reaction center W protein	GRMZM2G046284_T01	32116.1	Fructose-bisphosphate aldolase	GRMZM2G010884_T01	20453.2	Chlorophyll a-b binding protein 8	GRMZM2G068557_T01	19836.3	Ferric reductase-like transmembrane component
Seed/endosperm tissues
10DAP_Whole seed	FPKM	Functional annotation	12DAP_Whole seed	FPKM	Functional annotation	14DAP_Whole seed	FPKM	Functional annotation	16DAP_Whole seed	FPKM	Functional annotation	12DAP_Endopsperm	FPKM	Functional annotation	14DAP_Endopsperm	FPKM	Functional annotation	16DAP_Endosperm	FPKM	Functional annotation
GRMZM2G150091_T01	18188	Thioredoxin H-type	GRMZM2G046532_T01	19429	Flower-specific gamma-thionin	AF546188.1_FGT007	35482	Zein-alpha 19C2	AF546188.1_FGT007	115632	Zein-alpha 19C2	GRMZM2G046532_T01	34256	Flower-specific gamma-thionin	AF546188.1_FGT007	63118	Zein-alpha 19C2	AF546188.1_FGT007	261838	Zein-alpha 19C2
AC195340.3_FGT001	8730	Tubulin alpha-3 chain	GRMZM2G091054_T01	19040	5a2 protein	AF546188.1_FGT005	31337	Zein-alpha A20	AF546188.1_FGT005	112610	Zein-alpha A20	GRMZM2G057823_T01	34081	Fructose-bisphosphate aldolase	AF546188.1_FGT005	56276	Zein-alpha A20	AF546188.1_FGT005	253506	Zein-alpha A20
GRMZM2G166141_T01	8262	Germin subfamily 1 member 17	GRMZM2G057823_T01	15071	Fructose-bisphosphate aldolase	GRMZM2G091054_T01	27454	5a2 protein	GRMZM2G100018_T01	60359	18kD delta zein	GRMZM2G091054_T01	26011	5a2 protein	GRMZM2G100018_T01	45833	18kD delta zein	GRMZM2G100018_T01	96842	18kD delta zein
GRMZM2G168651_T01	8073	Hydroxyproline-rich glycoprotein	GRMZM2G326111_T01	11828	Peptidyl-prolyl cis-trans isomerase	GRMZM2G046532_T01	25104	Flower-specific gamma-thionin	GRMZM2G044625_T01	38031	22-kDa alpha zein 4	GRMZM2G064302_T01	23190	Enolase 1	GRMZM2G174883_T01	37517	Legumin 1	GRMZM2G044625_T01	55430	22-kDa alpha zein 4
GRMZM2G046532_T01	7723	Flower-specific gamma-thionin	GRMZM2G087413_T01	10887	5a2 protein	GRMZM2G100018_T01	22418	18kD delta zein	GRMZM2G008341_T01	33436	Zein Zd1 (19 kDa zein)	GRMZM2G326111_T01	18565	Peptidyl-prolyl cis-trans isomerase	GRMZM2G057823_T01	37484	Fructose-bisphosphate aldolase	GRMZM2G008341_T01	53259	Zein Zd1 (19 kDa zein)
GRMZM2G091054_T01	7031	5a2 protein	GRMZM2G406552_T01	10829	Nonspecific lipid-transfer protein	GRMZM2G057823_T01	20885	Fructose-bisphosphate aldolase	GRMZM2G060429_T01	33157	Zein-beta	GRMZM2G174883_T01	15393	Legumin 1	GRMZM2G046532_T01	37401	Flower-specific gamma-thionin	GRMZM2G086294_T01	53190	15kD beta zein
GRMZM2G015295_T01	6882	Adenosylhomocysteinase	GRMZM2G066546_T01	10683	BET1 protein	GRMZM2G174883_T01	19513	Legumin 1	GRMZM2G046532_T01	31003	Flower-specific gamma-thionin	GRMZM2G006585_T01	14305	binding	GRMZM2G064302_T01	29198	Enolase 1	GRMZM2G060429_T01	46588	Zein-beta
GRMZM2G406552_T01	6478	Nonspecific lipid-transfer protein	GRMZM2G166141_T01	10249	Germin subfamily 1 member 17	GRMZM2G064302_T01	15241	Enolase 1	GRMZM2G174883_T01	27334	Legumin 1	GRMZM2G175423_T01	10991	Sorbitol dehydrogenase	GRMZM2G326111_T01	22209	Peptidyl-prolyl cis-trans isomerase	GRMZM2G046532_T01	43397	Flower-specific gamma-thionin
GRMZM2G152466_T01	6361	Tubulin alpha-3 chain	GRMZM2G064302_T01	9345	Enolase 1	GRMZM2G326111_T01	13765	Peptidyl-prolyl cis-trans isomerase	GRMZM2G091054_T01	24980	5a2 protein	GRMZM2G127160_T01	10171	Tryptophan aminotransferase	GRMZM2G091054_T01	20303	5a2 protein	GRMZM2G008913_T01	35877	Zein-alpha PMS2
AC209208.3_FGT002	6227	Aquaporin PIP1.1	AC195340.3_FGT001	8227	Tubulin alpha-3 chain	GRMZM2G406552_T01	10310	Nonspecific lipid-transfer protein	GRMZM2G008913_T01	23742	Zein-alpha PMS2	GRMZM2G406552_T01	10112	Nonspecific lipid-transfer protein	GRMZM2G086294_T01	18337	15kD beta zein	GRMZM2G064302_T01	35721	Enolase 1
Other tissues
16DAP_Embryo	FPKM	Functional annotation	24H_Germinating Seed	FPKM	Functional annotation	6DAS_GH_Primary Root	FPKM	Functional annotation
GRMZM2G337229_T01	33381.1	Oleosin	GRMZM2G147399_T01	27402.1	Early nodulin 93	GRMZM2G156861_T01	19018.7	Lipoxygenase
GRMZM2G101268_T01	17208.9	histone cluster 1, H2ae	GRMZM2G101958_T01	26598.1	Non-specific lipid-transfer protein	GRMZM2G066049_T01	18387.1	Agmatine coumaroyltransferase
GRMZM2G091715_T01	17173.3	Acyl carrier protein	GRMZM2G472248_T01	23899.7	Protein induced upon tuberization	GRMZM2G027098_T01	18191.6	Aquaporin TIP2-1
GRMZM2G046841_T01	14940	Histone H2B	GRMZM2G337229_T01	17020.8	Oleosin	GRMZM2G085924_T01	17597.9	Herbicide safener binding protein
GRMZM2G326111_T01	12896.8	Peptidyl-prolyl cis-trans isomerase	GRMZM2G131421_T01	16062.3	Early nodulin 93	GRMZM2G056908_T01	16879.3	Aquaporin TIP2-2
GRMZM2G088511_T01	12249.6	Hypothetical gene of unknown function	AC233879.1_FGT002	15168.4	Embryonic abundant protein 1	GRMZM2G043336_T01	12948.2	Phytase
AC233865.1_FGT001	11167.5	Histone H4	GRMZM2G161154_T01	13222.1	Metallothionein type 2	GRMZM2G016890_T01	10926	Beta-glucosidase, chloroplastic
AC195340.3_FGT001	11144.3	Tubulin alpha-3 chain	GRMZM2G057823_T01	13191.5	Fructose-bisphosphate aldolase	GRMZM2G477685_T01	10722.5	Physical impedance induced protein
GRMZM2G064302_T01	11126.7	Enolase 1	GRMZM2G368890_T01	12812	Low-molecular-weight cysteine-rich protein LCR68	AC206425.3_FGT002	10338.5	Jasmonate-induced protein
GRMZM2G306258_T01	11099	Histone H2B.4	GRMZM2G046532_T01	12798.1	Flower-specific gamma-thionin	GRMZM2G349791_T01	9976.17	O-methyltransferase ZRP4
